# Supplementary material
Source: HighWire-hosted journal article supplement (https://www.cmajopen.ca/highwire/filestream/80920/field_highwire_adjunct_files/1/open-2014-0089-2-at.pdf)

## Appendix 2 (as supplied by the authors): Supplementary Information

**Table A.** Risk of bias assessment for observational studies

| Author, Last name | Year | SELECTION BIAS                                  | PERFORMANCE BIAS                                                          |                                               | DETECTION BIAS                                                           |                                                                       | INFORMATION BIAS                                                                        |                                                      | Total (out of 21) |
|-------------------|------|-------------------------------------------------|---------------------------------------------------------------------------|-----------------------------------------------|--------------------------------------------------------------------------|-----------------------------------------------------------------------|-----------------------------------------------------------------------------------------|------------------------------------------------------|-------------------|
|                   |      | Is the <b>source population</b> representative? | Is the <b>sample size</b> adequate and is there sufficient <b>power</b> ? | Did the study adjust for <b>confounders</b> ? | Did the study use appropriate <b>statistics</b> for outcome of interest? | Is there little <b>missing data</b> and was it handled appropriately? | Are the <b>methods or outcome measurements</b> explicitly stated and is it appropriate? | Is there an <b>objective assessment</b> of outcomes? |                   |
| Anglin            | 1987 | 2                                               | 1                                                                         | 1                                             | 2                                                                        | 1                                                                     | 1                                                                                       | 1                                                    | 9                 |
| Brown             | 1993 | 1                                               | 1                                                                         | 1                                             | 2                                                                        | 2                                                                     | 2                                                                                       | 1                                                    | 10                |
| Camacho           | 1996 | 2                                               | 2                                                                         | 1                                             | 2                                                                        | 2                                                                     | 3                                                                                       | 1                                                    | 13                |
| Chatham           | 1999 | 2                                               | 2                                                                         | 1                                             | 2                                                                        | 2                                                                     | 3                                                                                       | 3                                                    | 15                |
| Grella            | 2012 | 1                                               | 2                                                                         | 1                                             | 1                                                                        | 1                                                                     | 2                                                                                       | 1                                                    | 9                 |
| Haug              | 2005 | 1                                               | 1                                                                         | 1                                             | 2                                                                        | 2                                                                     | 3                                                                                       | 3                                                    | 13                |
| Hser              | 1990 | 2                                               | 2                                                                         | 1                                             | 2                                                                        | 2                                                                     | 1                                                                                       | 0                                                    | 10                |
| Jimenez-Trevino   | 2011 | 1                                               | 1                                                                         | 1                                             | 2                                                                        | 0                                                                     | 2                                                                                       | 1                                                    | 8                 |
| Marsh             | 1986 | 1                                               | 1                                                                         | 1                                             | 1                                                                        | 2                                                                     | 1                                                                                       | 0                                                    | 7                 |
| Mulvaney          | 1999 | 2                                               | 2                                                                         | 1                                             | 2                                                                        | 2                                                                     | 2                                                                                       | 2                                                    | 13                |
| Peles             | 2006 | 2                                               | 1                                                                         | 1                                             | 2                                                                        | 1                                                                     | 3                                                                                       | 2                                                    | 12                |
| Rutherford        | 1997 | 1                                               | 1                                                                         | 1                                             | 2                                                                        | 1                                                                     | 2                                                                                       | 0                                                    | 8                 |
| Savage            | 1980 | 2                                               | 2                                                                         | 1                                             | 1                                                                        | 2                                                                     | 1                                                                                       | 0                                                    | 9                 |
| Schiff            | 2007 | 2                                               | 2                                                                         | 1                                             | 2                                                                        | 1                                                                     | 1                                                                                       | 3                                                    | 12                |
| Schilling         | 1991 | 1                                               | 1                                                                         | 1                                             | 2                                                                        | 2                                                                     | 2                                                                                       | 0                                                    | 9                 |
| Steer             | 1980 | 2                                               | 1                                                                         | 2                                             | 3                                                                        | 2                                                                     | 2                                                                                       | 0                                                    | 12                |
| Stenbacka         | 2003 | 2                                               | 2                                                                         | 1                                             | 2                                                                        | 1                                                                     | 3                                                                                       | 3                                                    | 14                |
| Webber            | 1999 | 1                                               | 2                                                                         | 2                                             | 2                                                                        | 2                                                                     | 2                                                                                       | 2                                                    | 13                |

0 = Definitely no; 1 = Mostly no; 2 = Mostly yes; 3 = Definitely yes

**Table B.** Risk of bias assessment for RCTs

| Author, Last name | Year | 1. Was the <b>allocation sequence generated</b> adequately? | 2. Was allocation <b>concealed</b> adequately? | 3. Was <b>knowledge of intervention</b> adequately prevented? | 4. Were <b>incomplete data</b> adequately addressed? | 5. Are reports of the study free of <b>selective outcome reporting</b> ? | 6. Was the study free of other problems that could put it at <b>high risk of bias</b> ? |
|-------------------|------|-------------------------------------------------------------|------------------------------------------------|---------------------------------------------------------------|------------------------------------------------------|--------------------------------------------------------------------------|-----------------------------------------------------------------------------------------|
| Jones             | 2005 | 1                                                           | 1                                              | 1                                                             | 1                                                    | 1                                                                        | 1                                                                                       |
| Schottenfeld      | 1998 | 1                                                           | 1                                              | 1                                                             | 1                                                    | 1                                                                        | 1                                                                                       |

1 = Low risk of bias

**Figure A.** Cohort and randomized controlled studies measuring illicit opioid use during treatment

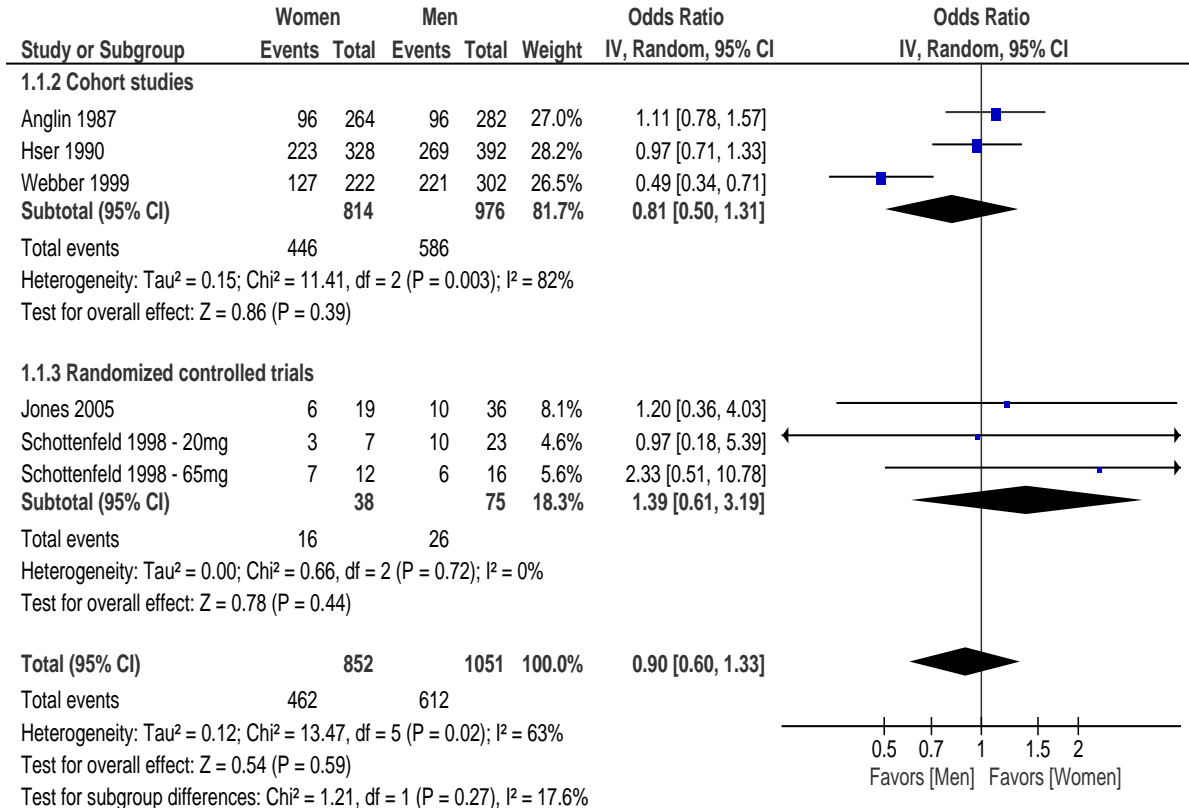

**Figure B.** Number of subjects with 12-20 months of treatment retention

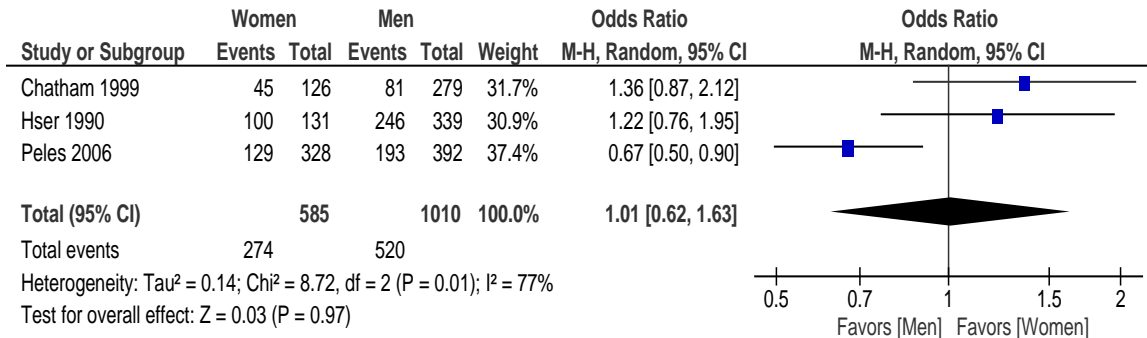

**Figure C. Benzodiazepine use over the last six months measured using urine toxicology**

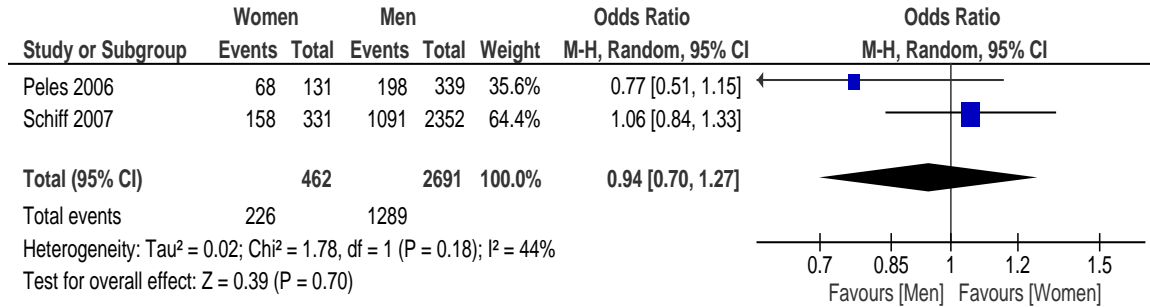

**Figure D. Cannabis use over the last six months measured using urine toxicology**

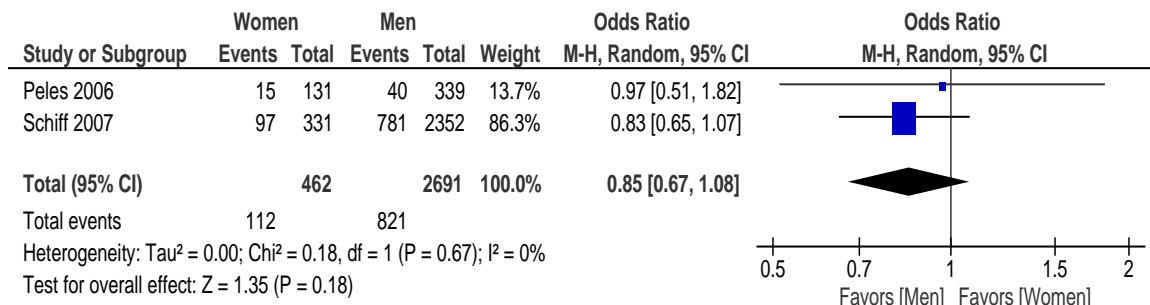

**Figure E. Cocaine use over the last six months measured using urine toxicology**

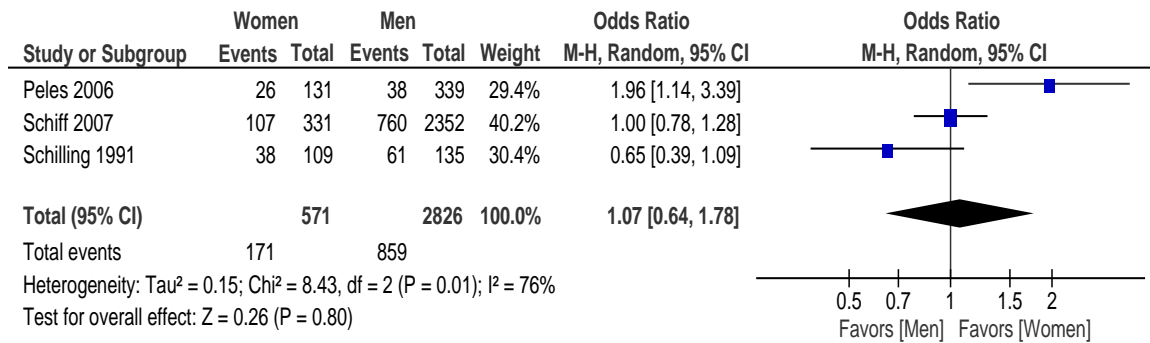

**Figure F. Mean methadone dose after 6-12 months in treatment (mg/day)**

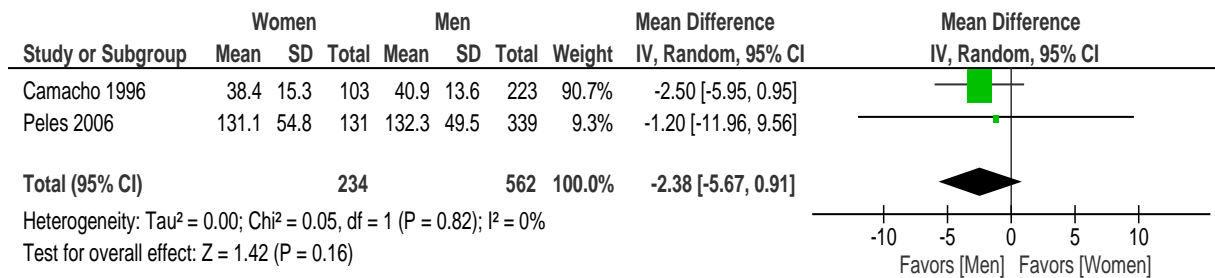

**Figure G.** Number of subjects currently married or living with spouse

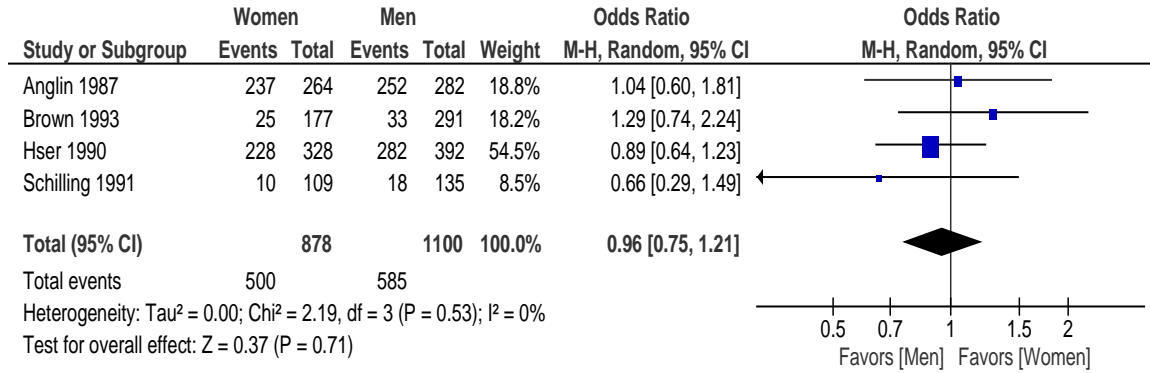

**Figure H.** Number of deaths reported at one year after treatment completion

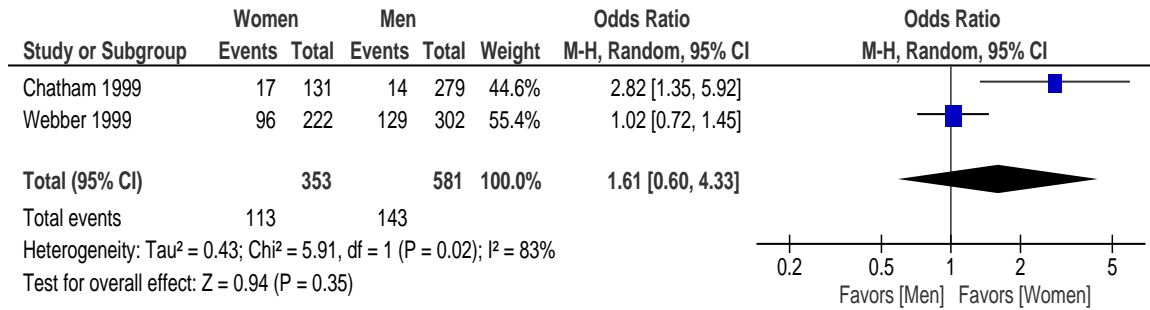

Supplement: open-2014-0089-2-at.pdf [file open-2014-0089-2-at.pdf]
